# Supplementary material for: Maternal Vitamin D Level Is Associated with Viral Toll-Like Receptor Triggered IL-10 Response but Not the Risk of Infectious Diseases in Infancy
Source: Hindawi journal article supplement (doi:10.1155/2016/8175898), 2016-01-01
Supplement: f1 [file 8175898.f1.pdf]

Supplement 1 Association between maternal vitamin D status and maternal toll-like receptor triggered cytokine response

|                      | <u>Univariate analysis</u> |     | <u>Multivariate analysis</u> |     |
|----------------------|----------------------------|-----|------------------------------|-----|
|                      | $\beta$ (95% CI)           | p   | $\beta$ (95% CI)             | p   |
| <b><i>TLR1-2</i></b> |                            |     |                              |     |
| TNF- $\alpha$        | 0.06 (-0.003, 0.12)        | .06 | 0.05 (-0.02, 0.12)           | .14 |
| IL-6                 | -0.07 (-0.16, 0.03)        | .15 | -0.08 (-0.18, 0.03)          | .16 |
| IL-10                | -0.01 (-0.19, 0.18)        | .95 | 0.12 (-0.19, 0.43)           | .39 |
| <b><i>TLR3</i></b>   |                            |     |                              |     |
| TNF- $\alpha$        | 0.03 (-0.02, 0.07)         | .24 | 0.23 (-0.02, 0.07)           | .32 |
| IL-6                 | 0.01 (-0.05, 0.06)         | .85 | 0.01 (-0.05, 0.07)           | .72 |
| IL-10                | -0.15 (-0.35, 0.06)        | .14 | -0.04 (-0.45, 0.37)          | .83 |
| <b><i>TLR4</i></b>   |                            |     |                              |     |
| TNF- $\alpha$        | -0.004 (-0.09, 0.08)       | .92 | -0.08 (-0.10, 0.08)          | .85 |
| IL-6                 | -0.009 (-0.13, 0.11)       | .88 | 0.003 (-0.12, 0.13)          | .96 |
| IL-10                | 0.63 (0.12, 1.13)          | .02 | 0.66 (-0.11, 1.43)           | .08 |
| <b><i>TLR7-8</i></b> |                            |     |                              |     |
| TNF- $\alpha$        | 0.02 (-0.05, 0.08)         | .64 | 0.03 (-0.04, 0.10)           | .43 |
| IL-6                 | 0.01 (-0.07, 0.08)         | .99 | -0.03 (-0.12, 0.06)          | .51 |
| IL-10                | -0.04 (-0.32, 0.25)        | .79 | -0.30 (-0.93, 1.60)          | .57 |
| <b><i>PHA</i></b>    |                            |     |                              |     |
| TNF- $\alpha$        | 0.03 (-0.06, 0.11)         | .53 | 0.004 (-0.09, 0.10)          | .94 |
| IL-6                 | -0.03 (-0.10, 0.04)        | .46 | -0.03 (-0.11, 0.05)          | .41 |
| IL-10                | 0.02 (-0.15, 0.19)         | .81 | -0.07 (-0.32, 0.19)          | .58 |

Number of samples: (TNF: 47; IL-6: 41; IL-10: 28)

Adjusted for gestational age, gender, birth body weight, mode of delivery, maternal allergy, and season of birth

Supplement 2 Relation of maternal and cord blood 25(OH)D to TLR9-triggered cytokine response

|                                | <u>Univariate analysis</u> |     | <u>Multivariate analysis</u> |     |
|--------------------------------|----------------------------|-----|------------------------------|-----|
|                                | $\beta$ (95% CI)           | p   | $\beta$ (95% CI)             | p   |
| <b><i>Maternal 25(OH)D</i></b> |                            |     |                              |     |
| TNF- $\alpha$                  | 0.11 (-0.07, 0.30)         | .18 | 0.29 (-0.48 - 1.06)          | .13 |
| IL-6                           | 0.00 (-0.07, 0.67)         | .98 | 0.03 (-0.14 - 0.19)          | .65 |
| IL-10                          | -0.08 (-0.23, 0.08)        | .28 | -0.24 (-0.79 - 0.30)         | .25 |
| <b><i>Cord 25(OH)D</i></b>     |                            |     |                              |     |
| TNF- $\alpha$                  | -0.10 (-0.24, 0.04)        | .14 | -0.12 (-0.38, 0.14)          | .23 |
| IL-6                           | -0.05 (-0.12, 0.02)        | .12 | -0.06 (-0.15, 0.02)          | .12 |
| IL-10                          | -0.16 (-0.31, -0.01)       | .04 | -0.20 (-0.11, 0.07)          | .41 |

Number of samples: (TNF: 18; IL-6: 20; IL-10: 17)

Adjusted for gestational age, parity, gender, birth body weight, mode of delivery, and maternal allergy

Both 25(OH)D and cytokine level were logarithmically transformed for analysis as continuous variables
